# Supplementary material for: A Novel Mechanism for Bone Loss: Platelet Count Negatively Correlates with Bone Mineral Density via Megakaryocyte-Derived RANKL
Source: MDPI journal article supplement (doi:10.3390/ijms241512150), 2023-07-29
Supplement: s1 [file s1]

Table S1. The PCR primers for M-CSF, OPG, RANKL, and GAPDH.

| Genes | Primers                              |                                      |
|-------|--------------------------------------|--------------------------------------|
|       | Forward                              | Reverse                              |
| RANKL | 5'-GCC TTT CAA GGA GCT GTG CAA AA-3' | 5'-GAG CAA AAG GCT GAG CTT CAA GC-3' |
| OPG   | 5'-GGT CTC CTG CTA ACT CAG AAA GG-3' | 5'-CAG CAA ACC TGA AGA ATG CCT CC-3' |
| M-CSF | 5'-TGA GAC ACC TCT CCA GTT GCT G-3'  | 5'-GCA ATC AGG CTT GGT CAC CAC A-3'  |
| GAPDH | 5'-GTC TCC TCT GAC TTC AAC AGC G-3'  | 5'-ACC ACC CTG TTG CTG TAG CCA A-3'  |
